# Supplementary material for: Controls on fault zone structure and brittle fracturing in the foliated hanging-wall of the Alpine Fault
Source: Copernicus journal article supplement (doi:10.5194/se-2017-112), 2017-10-10
Supplement: Supplementary file 1 [file se-2017-112-supplement.pdf]

1 Supplementary Material

2 Figure S1

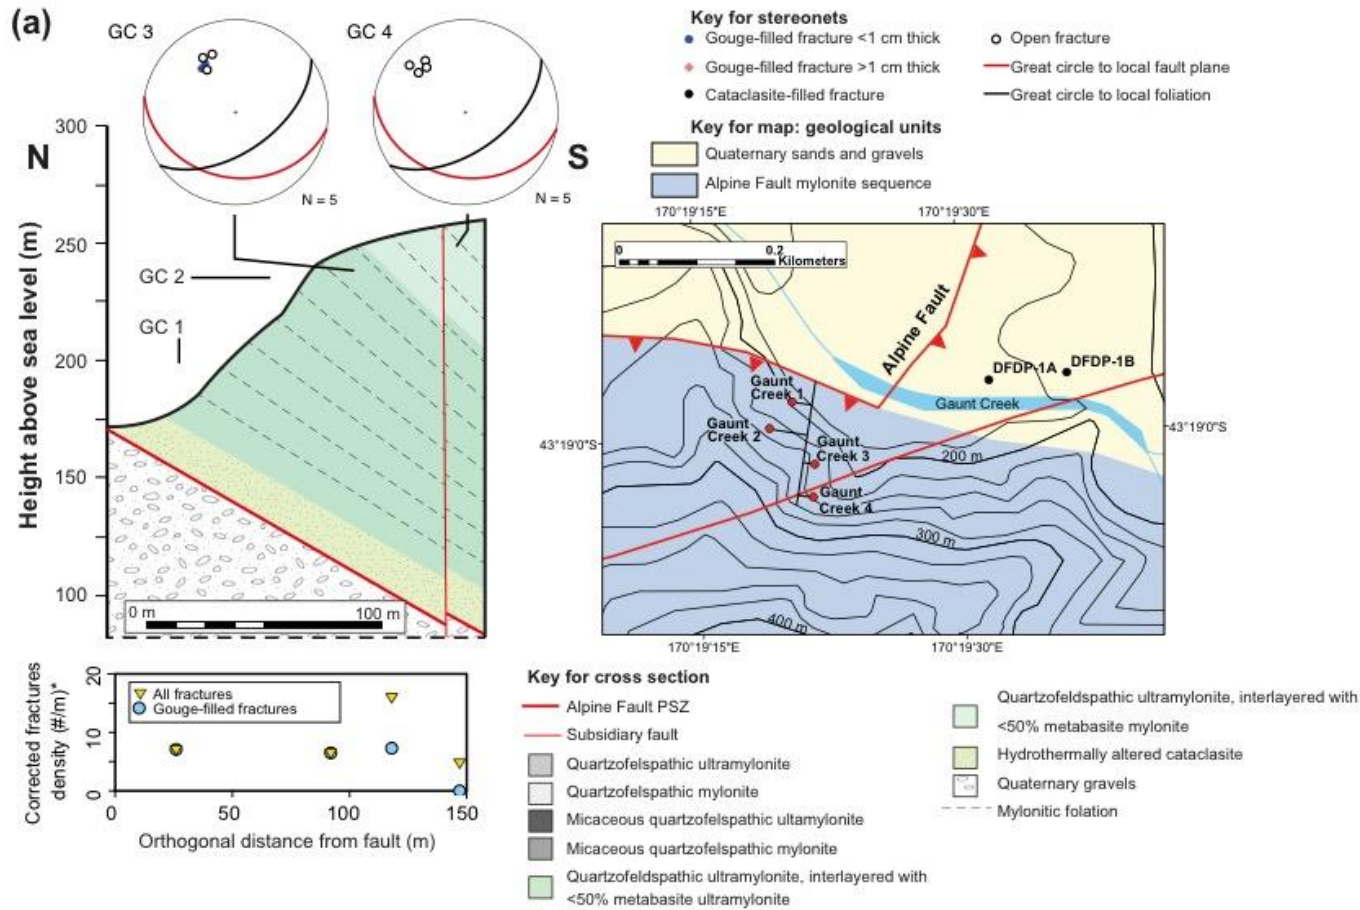

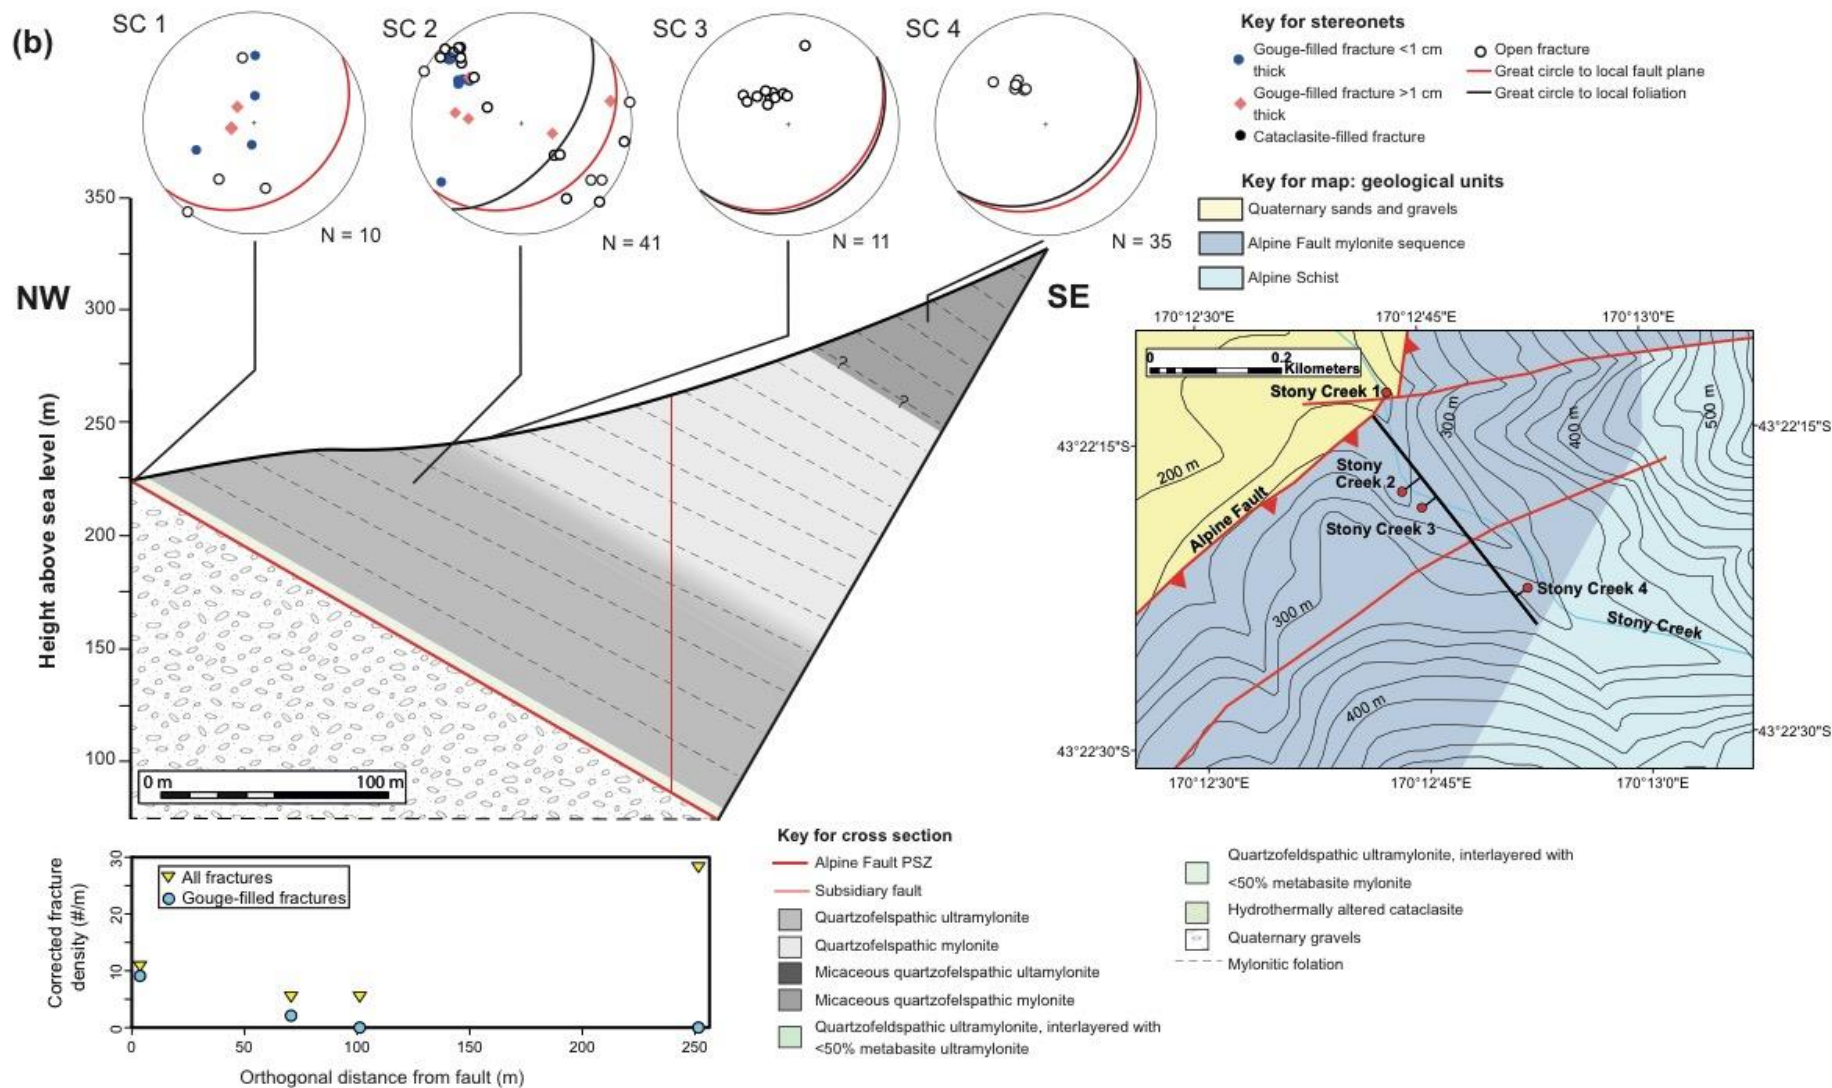

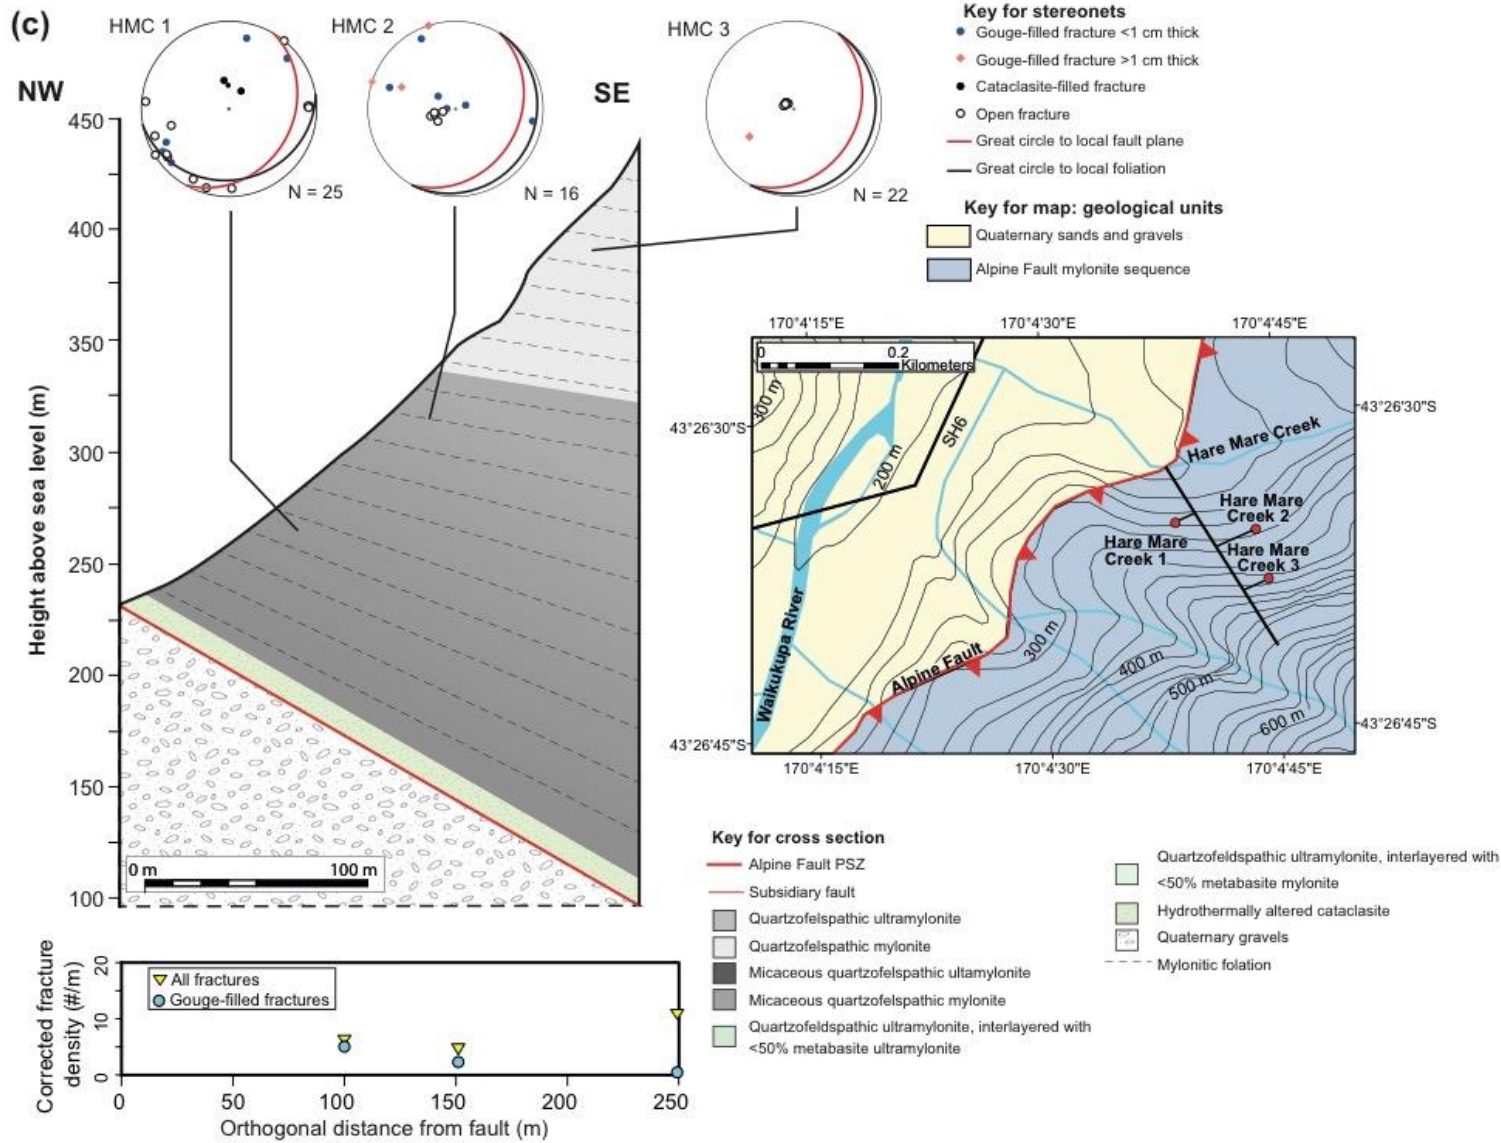

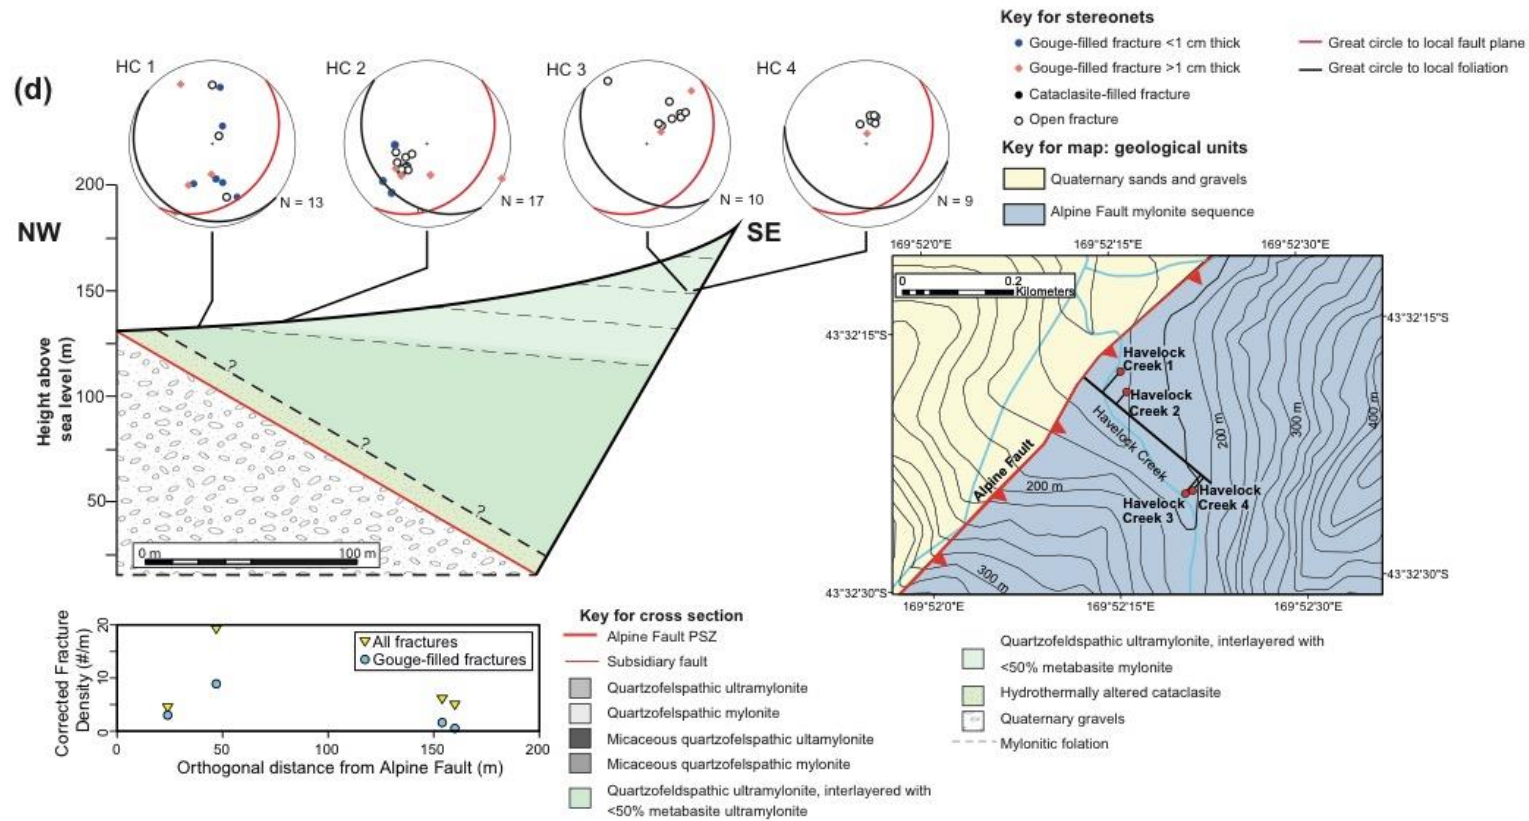

6

7 Figure S1: Cross sections showing varying intensity and style of damage with distance from the Alpine Fault principal slip zones (PSZ) for: (a)  
 8 Gaunt Creek, (b) Stony Creek, (c) Hare Mare Creek and (d) Havelock Creek. Alpine Fault location as mapped during the University of Otago's  
 9 Department of Geology fault zone mapping program (<http://www.otago.ac.nz/geology/research/structural-geology/alpine-fault/af-maps.html>).

10 Each cross section also presents: (1) the corrected density of fractures at all stations as a function of the orthogonal distance from the fault, (2)

11 fracture orientations at each station, and (3) a map of the stations with respect to the fault and cross section. Location of these sites shown in  
12 Figure 1b. Fault rock lithologies previously described by Toy, (2008). SH-6 in (c), State Highway 6. \*Density of fractures calculated from two  
13 perpendicular transects at Gaunt Creek stations 1 and 2.  
14

15 **Figure S2**

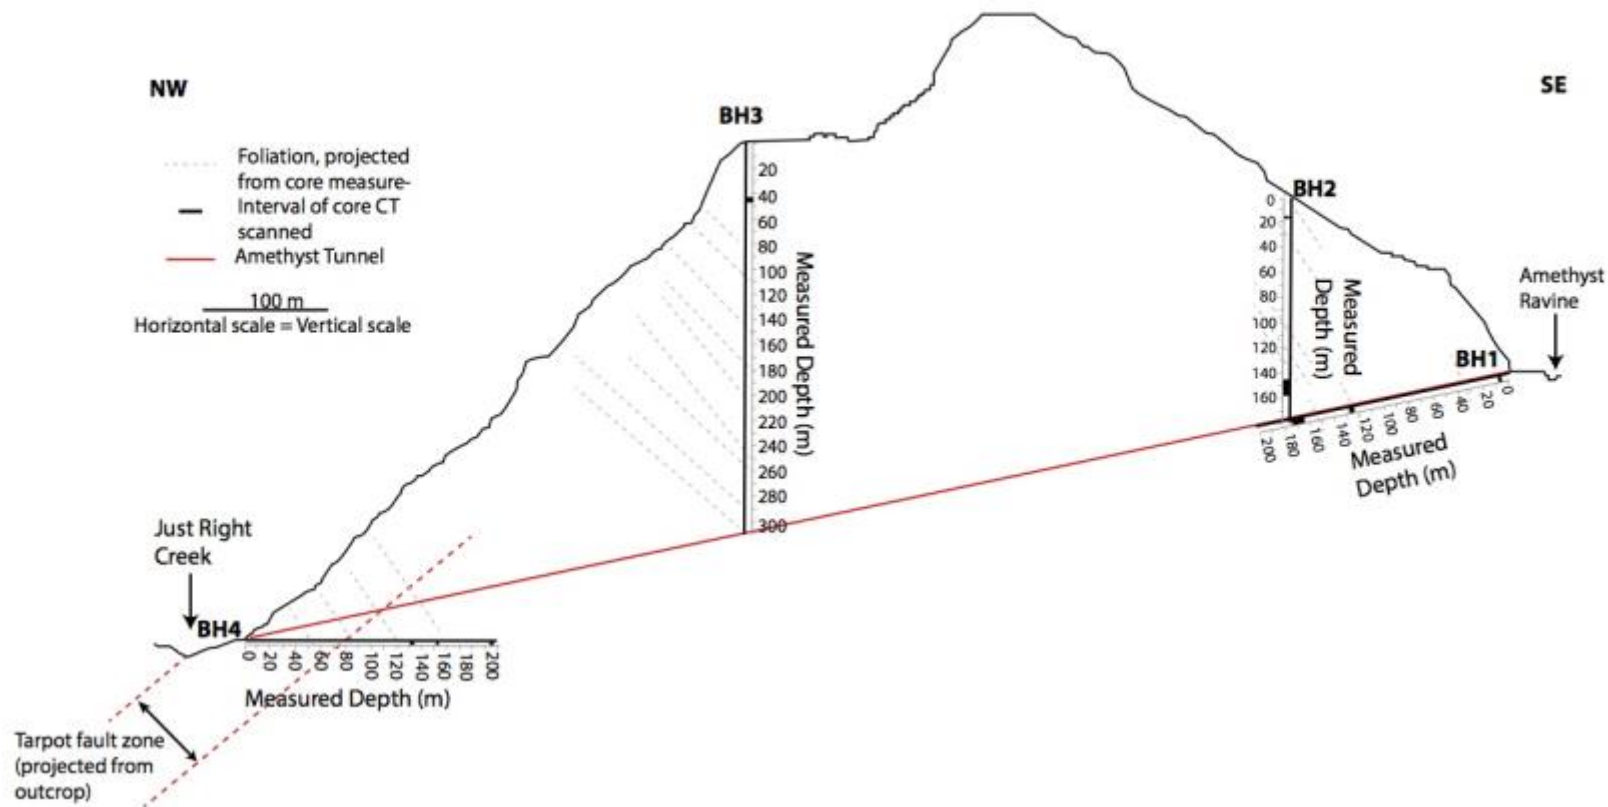

16

17 Figure S2: Cross section through the Amethyst Tunnel and its four exploratory boreholes (B1-4), Hari Hari, Westland New Zealand. See Figure

18 1b for location. Modified from Geotech Consulting Limited (2006), to show where intervals of drill-core that were CT scanned are located.

19 **Figure S3**

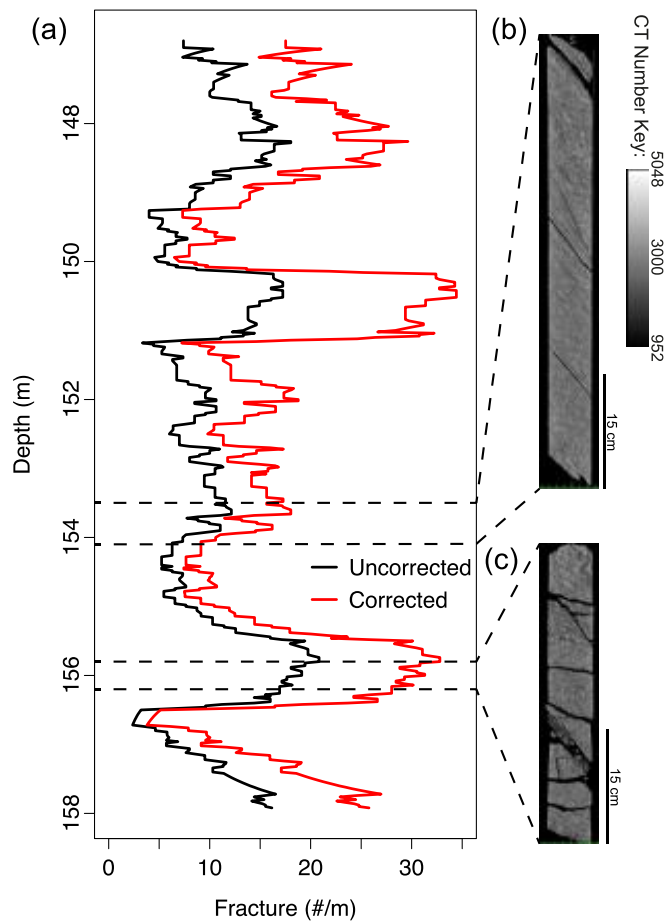

20

21 Figure S3: Fracture density variations measured within CT scans of AHP drill-core from  
22 BH2, depth interval 146.8-157.9 m. (a) Fracture density calculated using a moving average  
23 (uncorrected for orientation bias) and weighted moving average (corrected), calculated at  
24 intervals of 2 cm with 1 m moving window. Full description and justification of this  
25 technique for measuring fracture density is presented in Williams et al., (2016). Core-axial  
26 parallel CT scans of representative core sections with (b) low, and (c) high fracture density  
27 are also given. (b) Core section (borehole-core run-core section-depth interval) BH2-74-3-  
28 153.5-154,1 (c) BH2-75-2-155.8-156.2.

29 **Table S1**

| Core Section | Depth of<br>matched<br>structure (m) | Counterclockwise<br>rotation to match<br>BHTV (°) | Rotation<br>applied (°) | Quality of<br>match |
|--------------|--------------------------------------|---------------------------------------------------|-------------------------|---------------------|
| 29-1         | 94.75                                | 313                                               | 310                     | Good                |
|              | 94.90                                | 307                                               |                         |                     |
| 31-1         | 96.70                                | 319                                               | 319                     | Poor                |
| 31-2         | 97.35                                | 16                                                | 20                      | Good                |
|              | 97.45                                | 24                                                |                         |                     |
| 32-1         | 98.51                                | 124                                               | 124                     | Poor                |
| 33-2         | <b>99.45</b>                         | <b>164</b>                                        | 170                     | Good                |
|              | 99.50                                | 186                                               |                         |                     |
|              | 100.00                               | 158                                               |                         |                     |
| 34-1         | 100.90                               | 349                                               | 330                     | Good                |
|              | 101.30                               | 333                                               |                         |                     |
|              | <b>101.35</b>                        | <b>326</b>                                        |                         |                     |
| 34-2         | 101.65                               | 199                                               | 199                     | Poor                |
| 35-1         | 102.15                               | 294                                               | 287                     | Moderate            |
|              | 102.20                               | 281                                               |                         |                     |
| 35-2         | 102.85                               | 307                                               | 307                     | Good                |
|              | 103.15                               | 306                                               |                         |                     |
| 36-1         | 103.65                               | 93                                                | 85                      | Good                |
|              | 103.75                               | 77                                                |                         |                     |
|              | <b>104.30</b>                        | <b>94</b>                                         |                         |                     |
| 36-2         | 104.40                               | 204                                               | 211                     | Moderate            |
|              | 104.85                               | 217                                               |                         |                     |



| <b>Core Section</b> | <b>Depth of<br/>matched<br/>structure (m)</b> | <b>Counterclockwise<br/>rotation to match<br/>BHTV (°)</b> | <b>Rotation<br/>applied (°)</b> | <b>Quality of<br/>match</b> |
|---------------------|-----------------------------------------------|------------------------------------------------------------|---------------------------------|-----------------------------|
| 37-1                | 105.6                                         | 246                                                        | 245                             | Good                        |
|                     | 105.95                                        | 244                                                        |                                 |                             |
| 37-2                | 106.16                                        | 198                                                        | 202                             | Moderate                    |
|                     | 106.30                                        | 219                                                        |                                 |                             |
|                     | 106.55                                        | 189                                                        |                                 |                             |
| 38-1                | 107.25                                        | 3                                                          | 11                              | Moderate                    |
|                     | 107.30                                        | 27                                                         |                                 |                             |
|                     | 107.34                                        | 5                                                          |                                 |                             |
| 39-1                | 107.65                                        | 114                                                        | 110                             | Good                        |
|                     | 107.70                                        | 111                                                        |                                 |                             |
|                     | 108.15                                        | 106                                                        |                                 |                             |
| 39-3/40-1           | 108.70                                        | 116                                                        | 109                             | Moderate                    |
|                     | 108.80                                        | 102                                                        |                                 |                             |
| 41-1                | 110.05                                        | 155                                                        | 148                             | Good                        |
|                     | 110.10                                        | 144                                                        |                                 |                             |
|                     | 110.25                                        | 145                                                        |                                 |                             |
| 41-2                | 110.60                                        | 101                                                        | 106                             | Moderate                    |
|                     | 110.70                                        | 111                                                        |                                 |                             |
| 43-1                | 111.65                                        | 229                                                        | 223                             | Moderate                    |
|                     | 111.85                                        | 235                                                        |                                 |                             |
|                     | 112.15                                        | 205                                                        |                                 |                             |
| 45-1                | 113.00                                        | 112                                                        | 96                              | Moderate                    |
|                     | 113.20                                        | 89                                                         |                                 |                             |
|                     | 113.65                                        | 87                                                         |                                 |                             |

| <b>Core Section</b> | <b>Depth of<br/>matched<br/>structure (m)</b> | <b>Counterclockwise<br/>rotation to match<br/>BHTV (°)</b> | <b>Rotation<br/>applied (°)</b> | <b>Quality of<br/>match</b> |
|---------------------|-----------------------------------------------|------------------------------------------------------------|---------------------------------|-----------------------------|
| 46-1                | 114.00                                        | 17                                                         | 21                              | Good                        |
|                     | 114.10                                        | 25                                                         |                                 |                             |
| 48-1                | 114.70                                        | 10                                                         | 8                               | Good                        |
|                     | 114.95                                        | 5                                                          |                                 |                             |
|                     | 115.00                                        | 8                                                          |                                 |                             |
| 49-1                | 115.70                                        | 108                                                        | 110                             | Good                        |
|                     | 116.25                                        | 112                                                        |                                 |                             |
| 52-1                | 118.65                                        | 132                                                        | 135                             | Good                        |
|                     | 118.95                                        | 134                                                        |                                 |                             |
|                     | 119.05                                        | 140                                                        |                                 |                             |
| 53-1                | 120.70                                        | 338                                                        | 338                             | Poor                        |
| 53-2                | 121.40                                        | 267                                                        | 267                             | Poor                        |
| 54-1                | 122.15                                        | 47                                                         | 40                              | Moderate                    |
|                     | 122.30                                        | 45                                                         |                                 |                             |
|                     | 122.40                                        | 28                                                         |                                 |                             |
| 54-2                | 122.85                                        | 279                                                        | 280                             | Good                        |
|                     | 122.90                                        | 281                                                        |                                 |                             |
| 55-1                | 123.40                                        | 325                                                        | 317                             | Moderate                    |
|                     | 123.75                                        | 309                                                        |                                 |                             |
| 56-1                | 124.95                                        | 340                                                        | 333                             | Moderate                    |
|                     | 125.35                                        | 327                                                        |                                 |                             |
| 56-2                | 126.00                                        | 313                                                        | 328                             | Good                        |
|                     | <b>126.10</b>                                 | <b>325</b>                                                 |                                 |                             |
|                     | <b>126.20</b>                                 | <b>331</b>                                                 |                                 |                             |

30 Table S1: Summary of rotations applied to DFDP-1B core sections to rotate drill-core back  
31 into a geographic reference frame. Numbers in bold indicate matching between prominent  
32 structures in the drill-core and so the rotation applied is weighted towards them. Quality of  
33 matching refers to classification scheme outlined Appendix A.

34 **Table S2**

| Transect      | Orthogonal distance from Alpine Fault (m) | Lithology                                 | Length of Scanline (m) | Orientation of scanline | Total fracture density (#/m) | Corrected total fracture density (weighted #/m) | Gouge filled fracture density (#/m) | Corrected gouge filled fracture density (weighted #/m) |
|---------------|-------------------------------------------|-------------------------------------------|------------------------|-------------------------|------------------------------|-------------------------------------------------|-------------------------------------|--------------------------------------------------------|
| Gaunt Creek 1 | 25                                        | Protocataclasite-ultramylonite transition | 2.4                    | *                       | 7.1                          |                                                 | 7.1                                 |                                                        |
| Gaunt Creek 2 | 90                                        | Q-Fs ultramylonites with <50% metabasics  | 1.7                    | *                       | 6.5                          |                                                 | 6.5                                 |                                                        |
| Gaunt Creek 3 | 118                                       | Q-Fs ultramylonites with <50% metabasics  | 1                      | 00/034                  | 5.0                          | 16.0                                            | 2.0                                 | 7.3                                                    |
| Gaunt Creek 4 | 147                                       | Q-Fs mylonites with <50% metabasics       | 2.2                    | 22/023                  | 2.3                          | 4.6                                             | 0                                   | 0                                                      |

---

|                      |     |                            |     |                  |     |      |     |     |
|----------------------|-----|----------------------------|-----|------------------|-----|------|-----|-----|
| Stony<br>Creek 1     | 7   | Q-Fs ultramylonite         | 2   | Vertical         | 5.2 | 11   | 4.0 | 9.1 |
| Stony<br>Creek 2     | 73  | Q-Fs mylonite              | 9.4 | 00/301           | 4.4 | 5.6  | 1.5 | 2.1 |
| Stony<br>Creek 3     | 103 | Q-Fs mylonite              | 2.4 | Vertical         | 4.6 | 5.6  | 0   | 0   |
| Stony<br>Creek 4     | 251 | Micaceous mylonite         | 1.6 | Vertical         | 22  | 28.4 | 0   | 0   |
| Hare Mare<br>Creek 1 | 100 | Micaceous<br>ultramylonite | 6.4 | 00/146,<br>00/52 | 3.6 | 6.6  | 0.8 | 5.3 |
| Hare Mare<br>Creek 2 | 151 | Micaceous mylonite         | 7.7 | 20/339           | 2.5 | 5.0  | 1.4 | 2.6 |

---

---

|                      |     |                                                              |      |          |      |      |     |     |
|----------------------|-----|--------------------------------------------------------------|------|----------|------|------|-----|-----|
| Hare Mare<br>Creek 3 | 250 | Q_Fs mylonite                                                | 2    | Vertical | 10.7 | 11.1 | 0.5 | 0.8 |
| Havelock<br>Creek 1  | 24  | Q-Fs ultramylonites<br>with <50% metabasics                  | 5.8  | 00/020   | 2.8  | 4.5  | 1.7 | 3.0 |
| Havelock<br>Creek 2  | 48  | Q-Fs and micaceous<br>ultramylonites with<br><50% metabasics | 2.1  | Vertical | 14.2 | 19.3 | 3.8 | 8.9 |
| Havelock<br>Creek 3  | 154 | Q-Fs mylonite with<br><50% metabasics                        | 3.7  | 00/005   | 2.7  | 6.1  | 0.3 | 1.6 |
| Havelock<br>Creek 4  | 160 | Q-Fs mylonite with<br><50% metabasics                        | 1.95 | Vertical | 4.6  | 5    | 0.5 | 0.5 |
| Bullock<br>Creek     | 520 | Q-Fs mylonite                                                | 17   | 00/008   | 1.65 | 3.7  | 0.3 | 0.9 |

---

35 Table S2: Compilation of results from scanline fracture analysis around the Alpine Fault. Fracture densities are given to 1 decimal place. Q-Fs,  
36 quartzofeldspathic. \*At Gaunt Creek stations 1 and 2, a horizontal and vertical scanline was used to collect fracture information at each station.  
37 Orientation were not collected so no 'corrected' fracture density was calculated.
